# Supplementary material for: Batoniite, [Al8(OH)14(H2O)18](SO4)5 ⋅ 5H2O, a new mineral with the [Al8(OH)14(H2O)18]10+ polyoxocation from the Cetine di Cotorniano Mine, Tuscany, Italy
Source: Copernicus journal article supplement (doi:10.5194/ejm-35-703-2023), 2023-08-31
Supplement: Supplementary file 1 [file Supplementary Tables S1 and S2 .pdf › Supplementary Tables S1 and S2 .pdf]

1 **Table S1.** Bond-valence sums (in valence units, v.u.) in batoniite.

|       | Al(1) | Al(2) | Al(3) | Al(4) | Al(5) | Al(6) | Al(7) | Al(8) | S(1) | S(2) | S(3) | S(4) | S(5) | $\Sigma_{\text{anions}}$ | $\Sigma_{\text{anions}}^*$ |
|-------|-------|-------|-------|-------|-------|-------|-------|-------|------|------|------|------|------|--------------------------|----------------------------|
| O(1)  | 0.49  |       |       |       |       |       |       |       |      |      |      |      |      | 0.49                     | 0.04                       |
| O(2)  | 0.58  | 0.53  |       |       |       |       |       |       |      |      |      |      |      | 1.11                     | 0.94                       |
| O(3)  | 0.57  |       | 0.58  |       |       |       |       |       |      |      |      |      |      | 1.15                     | 1.00                       |
| O(4)  | 0.44  |       |       |       |       |       |       |       |      |      |      |      |      | 0.44                     | 0.00                       |
| O(5)  | 0.51  |       |       |       |       |       |       |       |      |      |      |      |      | 0.51                     | -0.02                      |
| O(6)  | 0.53  |       |       |       |       |       |       |       |      |      |      |      |      | 0.53                     | 0.00                       |
| O(7)  |       | 0.45  | 0.42  |       |       |       |       |       |      |      |      |      |      | 1.29                     | 1.13                       |
| O(8)  |       | 0.55  | 0.42  | 0.58  |       |       |       |       |      |      |      |      |      | 1.13                     | 0.96                       |
| O(9)  |       | 0.54  | 0.55  |       |       |       |       |       |      |      |      |      |      | 1.09                     | 0.98                       |
| O(10) |       | 0.58  | 0.57  |       |       |       |       |       |      |      |      |      |      | 1.15                     | 0.96                       |
| O(11) |       | 0.50  |       |       |       |       |       |       |      |      |      |      |      | 0.50                     | 0.15                       |
| O(12) |       |       | 0.56  | 0.58  |       |       |       |       |      |      |      |      |      | 1.14                     | 0.98                       |
| O(13) |       |       |       | 0.44  |       |       |       |       |      |      |      |      |      | 0.44                     | 0.09                       |
| O(14) |       |       |       | 0.53  |       |       |       |       |      |      |      |      |      | 0.53                     | 0.07                       |
| O(15) |       |       |       | 0.50  |       |       |       |       |      |      |      |      |      | 0.50                     | 0.10                       |
| O(16) |       |       |       | 0.43  |       |       |       |       |      |      |      |      |      | 0.43                     | 0.04                       |
| O(17) |       |       |       |       | 0.47  |       |       |       |      |      |      |      |      | 0.47                     | -0.02                      |
| O(18) |       |       |       |       | 0.57  | 0.57  |       |       |      |      |      |      |      | 1.14                     | 0.97                       |
| O(19) |       |       |       |       | 0.59  |       | 0.56  |       |      |      |      |      |      | 1.15                     | 0.98                       |
| O(20) |       |       |       |       | 0.47  |       |       |       |      |      |      |      |      | 0.47                     | 0.02                       |
| O(21) |       |       |       |       | 0.49  |       |       |       |      |      |      |      |      | 0.49                     | 0.06                       |
| O(22) |       |       |       |       | 0.50  |       |       |       |      |      |      |      |      | 0.50                     | 0.09                       |
| O(23) |       |       |       |       |       | 0.58  |       | 0.57  |      |      |      |      |      | 1.15                     | 0.94                       |
| O(24) |       |       |       |       |       | 0.56  | 0.54  |       |      |      |      |      |      | 1.10                     | 1.00                       |
| O(25) |       |       |       |       |       | 0.42  | 0.47  |       |      |      |      |      |      | 1.30                     | 1.09                       |
| O(26) |       |       |       |       |       | 0.41  |       |       |      |      |      |      |      |                          |                            |
| O(27) |       |       |       |       |       | 0.55  | 0.48  |       |      |      |      |      |      | 1.03                     | 0.93                       |
| O(28) |       |       |       |       |       |       | 0.55  |       |      |      |      |      |      | 0.55                     | 0.03                       |
| O(29) |       |       |       |       |       |       | 0.52  | 0.57  |      |      |      |      |      | 1.09                     | 0.94                       |
| O(30) |       |       |       |       |       |       |       | 0.50  |      |      |      |      |      | 0.50                     | 0.05                       |
| O(31) |       |       |       |       |       |       |       | 0.45  |      |      |      |      |      | 0.45                     | 0.05                       |
| O(32) |       |       |       |       |       |       |       | 0.50  |      |      |      |      |      | 0.50                     | -0.01                      |
| O(33) |       |       |       |       |       |       |       | 0.45  |      |      |      |      |      | 0.45                     | 0.00                       |
| O(34) |       |       |       |       |       |       |       |       | 1.50 |      |      |      |      | 1.50                     | 2.04                       |
| O(35) |       |       |       |       |       |       |       |       | 1.57 |      |      |      |      | 1.57                     | 1.98                       |
| O(36) |       |       |       |       |       |       |       |       | 1.53 |      |      |      |      | 1.53                     | 2.00                       |
| O(37) |       |       |       |       |       |       |       |       | 1.48 |      |      |      |      | 1.48                     | 2.05                       |
| O(38) |       |       |       |       |       |       |       |       |      | 1.54 |      |      |      | 1.54                     | 2.04                       |
| O(39) |       |       |       |       |       |       |       |       |      | 1.45 |      |      |      | 1.45                     | 1.83 <sup>1</sup>          |
| O(40) |       |       |       |       |       |       |       |       |      |      | 1.52 |      |      | 1.52                     | 1.96                       |
| O(41) |       |       |       |       |       |       |       |       |      |      | 1.63 |      |      | 1.63                     | 2.04                       |
| O(42) |       |       |       |       |       |       |       |       |      |      |      | 1.49 |      |                          | 2.18 <sup>1</sup>          |
| O(43) |       |       |       |       |       |       |       |       |      |      |      | 1.49 |      | 1.49                     | 1.99                       |
| O(44) |       |       |       |       |       |       |       |       |      |      |      | 1.66 |      | 1.66                     | 2.13                       |
| O(45) |       |       |       |       |       |       |       |       |      |      |      | 1.57 |      | 1.57                     | 1.99                       |
| O(46) |       |       |       |       |       |       |       |       |      |      |      | 1.58 |      | 1.58                     | 2.15                       |
| O(47) |       |       |       |       |       |       |       |       |      |      |      |      | 1.49 | 1.49                     | 2.16                       |
| O(48) |       |       |       |       |       |       |       |       |      |      |      |      | 1.62 | 1.62                     | 2.06                       |
| O(49) |       |       |       |       |       |       |       |       |      |      |      |      | 1.57 | 1.57                     | 2.10                       |
| O(50) |       |       |       |       |       |       |       |       |      |      |      |      | 1.56 | 1.56                     | 2.08                       |
| O(51) |       |       |       |       |       |       |       |       |      |      |      |      |      | 1.53                     | 2.11                       |
| O(52) |       |       |       |       |       |       |       |       |      |      |      |      |      | 1.55                     | 2.07                       |
| Ow(1) |       |       |       |       |       |       |       |       |      |      |      |      |      | 1.52                     | 2.08                       |
| Ow(2) |       |       |       |       |       |       |       |       |      |      |      |      |      | 1.60                     | 2.01                       |
| Ow(3) |       |       |       |       |       |       |       |       |      |      |      |      |      | -                        | 0.15                       |
| Ow(4) |       |       |       |       |       |       |       |       |      |      |      |      |      | -                        | -0.07                      |
| Ow(5) |       |       |       |       |       |       |       |       |      |      |      |      |      | -                        | 0.12                       |
|       |       |       |       |       |       |       |       |       |      |      |      |      |      | -                        | 0.06                       |
|       |       |       |       |       |       |       |       |       |      |      |      |      |      | -                        | 0.07                       |

|                                                                                             |      |      |      |      |      |      |      |      |      |      |      |      |      |
|---------------------------------------------------------------------------------------------|------|------|------|------|------|------|------|------|------|------|------|------|------|
| $\Sigma_{\text{cations}}$                                                                   | 3.12 | 3.15 | 3.10 | 3.06 | 3.09 | 3.09 | 3.12 | 3.04 | 6.08 | 6.14 | 6.30 | 6.24 | 6.20 |
| Theor.                                                                                      | 3.00 | 3.00 | 3.00 | 3.00 | 3.00 | 3.00 | 3.00 | 3.00 | 6.00 | 6.00 | 6.00 | 6.00 | 6.00 |
| Note: * corrected for H-bonds (see Table 5). <sup>1</sup> if acceptor of H-bond from O(15). |      |      |      |      |      |      |      |      |      |      |      |      |      |

3 **Table S2.** X-ray powder diffraction data ( $d$  in Å) for batoniite.

| $I_{\text{obs}}$ | $d_{\text{obs}}$ | $d_{\text{calc}}$ | $I_{\text{calc}}$ | $h\ k\ l$ | $I_{\text{obs}}$ | $d_{\text{obs}}$ | $d_{\text{calc}}$ | $I_{\text{calc}}$ | $h\ k\ l$ |
|------------------|------------------|-------------------|-------------------|-----------|------------------|------------------|-------------------|-------------------|-----------|
| <b>s</b>         | <b>11.1</b>      | 10.97             | 91                | 0 1 1     | -                | -                | 3.370             | 6                 | -1 -3 2   |
| mw               | 10.5             | 10.37             | 35                | 0 0 2     |                  |                  | 3.324             | 5                 | 2 -2 2    |
| vw               | 9.3              | 9.16              | 5                 | 1 0 0     | vw               | 3.318            | 3.298             | 14                | -1 2 5    |
| <b>s</b>         | <b>8.5</b>       | 8.50              | 86                | 1 0 1     |                  |                  | 3.290             | 9                 | 0 -3 3    |
| m                | 8.3              | 8.25              | 30                | -1 0 1    | w                | 3.220            | 3.231             | 2                 | 1 3 4     |
| <b>s</b>         | <b>7.5</b>       | 7.45              | 100               | 1 1 0     |                  |                  | 3.219             | 3                 | 0 -1 6    |
|                  |                  | 7.41              | 9                 | 0 -1 2    |                  |                  | 3.082             | 8                 | 2 3 0     |
| vw               | 6.9              | 6.82              | 5                 | -1 1 1    |                  |                  | 3.077             | 9                 | 1 -3 3    |
| vw               | 6.4              | 6.33              | 6                 | 0 1 3     |                  |                  | 3.061             | 5                 | 1 -1 6    |
| w                | 6.0              | 5.98              | 10                | -1 1 2    | w                | 3.055            | 3.057             | 6                 | 2 3 2     |
|                  |                  | 5.95              | 10                | 0 2 1     |                  |                  | 3.054             | 12                | 1 -2 5    |
| mw               | 5.79             | 5.76              | 7                 | -1 -1 2   |                  |                  | 3.042             | 10                | -1 -2 5   |
| -                | -                | 5.63              | 7                 | 1 0 3     |                  |                  | 3.002             | 6                 | -3 0 1    |
| mw               | 5.46             | 5.48              | 18                | 0 2 2     |                  |                  | 2.997             | 10                | -2 -3 1   |
|                  |                  | 5.41              | 7                 | -1 0 3    | -                | -                | 2.936             | 6                 | -1 2 6    |
| -                | -                | 5.36              | 7                 | 1 1 3     | vw               | 2.895            | 2.887             | 8                 | 2 -3 1    |
| <b>ms</b>        | <b>5.20</b>      | 5.19              | 42                | 0 0 4     |                  |                  | 2.835             | 12                | -1 3 4    |
| -                | -                | 4.986             | 6                 | 0 1 4     | vw               | 2.835            | 2.835             | 6                 | 3 0 3     |
| -                | -                | 4.935             | 14                | 0 -2 2    |                  |                  | 2.821             | 5                 | -1 4 1    |
| -                | -                | 4.909             | 10                | 1 -2 0    |                  |                  | 2.808             | 5                 | 1 -4 0    |
|                  |                  | 4.862             | 36                | -1 2 1    | w                | 2.796            | 2.808             | 9                 | -3 1 2    |
| <b>ms</b>        | <b>4.87</b>      | 4.845             | 6                 | 1 2 2     |                  |                  | 2.803             | 5                 | 2 3 4     |
|                  |                  | 4.835             | 58                | -1 -2 1   |                  |                  | 2.699             | 9                 | -1 4 3    |
|                  |                  | 4.828             | 13                | 0 2 3     | w                | 2.699            | 2.697             | 5                 | -2 -3 3   |
| vw               | 4.58             | 4.562             | 10                | 0 -1 4    |                  |                  | 2.673             | 6                 | 3 1 4     |
|                  |                  | 4.490             | 13                | 1 1 4     | w                | 2.594            | 2.593             | 5                 | 0 0 8     |
| w                | 4.46             | 4.436             | 18                | -1 0 4    | vw               | 2.527            | 2.538             | 6                 | -3 1 4    |
| w                | 4.34             | 4.325             | 59                | 2 1 1     |                  |                  | 2.454             | 7                 | 1 -2 7    |
| w                | 4.29             | 4.252             | 56                | 2 0 2     | w                | 2.461            | 2.444             | 5                 | -1 4 5    |
|                  |                  | 4.131             | 9                 | -2 1 1    | vw               | 2.421            | 2.411             | 5                 | 3 2 5     |
|                  |                  | 4.127             | 5                 | -2 0 2    | w                | 2.372            | 2.370             | 6                 | -1 -1 8   |
| <b>vs</b>        | <b>4.08</b>      | 4.055             | 43                | -1 -1 4   | vw               | 2.341            | 2.331             | 7                 | 2 -3 5    |
|                  |                  | 4.014             | 36                | 0 3 1     | vw               | 2.316            | 2.290             | 6                 | -1 5 2    |
|                  |                  | 3.994             | 6                 | 0 3 0     | vw               | 2.243            | 2.245             | 6                 | 0 2 9     |
| vw               | 3.884            | 3.889             | 10                | 0 3 2     | vw               | 2.221            | 2.226             | 4                 | 3 -2 5    |
|                  |                  | 3.863             | 9                 | 1 -2 3    | vw               | 2.198            | 2.196             | 8                 | 4 1 3     |
|                  |                  | 3.838             | 19                | 1 0 5     | vw               | 2.121            | 2.132             | 7                 | 4 -1 3    |
| <b>ms</b>        | <b>3.793</b>     | 3.804             | 16                | 1 1 5     |                  |                  | 2.085             | 2                 | 1 3 9     |
|                  |                  | 3.781             | 25                | 0 -1 5    | vw               | 2.073            | 2.083             | 2                 | 2 -5 0    |
| -                | -                | 3.726             | 5                 | 1 3 0     |                  |                  | 2.069             | 2                 | 1 5 6     |
| -                | -                | 3.723             | 5                 | 2 2 0     |                  |                  | 2.063             | 2                 | -4 0 4    |
| -                | -                | 3.712             | 6                 | -1 2 4    | w                | 2.017            | 2.027             | 6                 | -2 -2 8   |
| w                | 3.646            | 3.661             | 19                | 1 3 2     | vw               | 1.976            |                   |                   |           |
|                  |                  | 3.623             | 12                | 0 2 5     | vw               | 1.944            |                   |                   |           |
|                  |                  | 3.605             | 13                | -2 1 3    | w                | 1.896            |                   |                   |           |
| <b>s</b>         | <b>3.563</b>     | 3.600             | 14                | 1 -3 0    | w                | 1.864            |                   |                   |           |
|                  |                  | 3.558             | 18                | 2 -2 0    | vw               | 1.832            |                   |                   |           |
|                  |                  | 3.550             | 40                | -2 -1 3   | w                | 1.763            |                   |                   |           |
|                  |                  | 3.531             | 7                 | -2 2 1    | vw               | 1.735            |                   |                   |           |
| mw               | 3.457            | 3.445             | 23                | 1 2 5     | vw               | 1.722            |                   |                   |           |
|                  |                  | 3.408             | 12                | -2 2 2    | vw               | 1.685            |                   |                   |           |

Intensity and  $d_{hkl}$  were calculated using the software *PowderCell* 2.3 (Kraus and Nolze, 1996) on the basis of the structural model given in Table 3. For  $d_{\text{obs}} > 2$  Å, observed and calculated X-ray lines are compared, showing only the reflections with  $I_{\text{calc}} > 5$ .  $I_{\text{obs}}$  were visually estimated: vs = very strong; s = strong; ms = medium-strong; m = medium; mw = medium-weak; w = weak; and vw = very weak. The eight strongest reflections are given in bold.
