# Supplementary material for: Batoniite, [Al8(OH)14(H2O)18](SO4)5 ⋅ 5H2O, a new mineral with the [Al8(OH)14(H2O)18]10+ polyoxocation from the Cetine di Cotorniano Mine, Tuscany, Italy
Source: Copernicus journal article supplement (doi:10.5194/ejm-35-703-2023), 2023-08-31
Supplement: Supplementary file [file ejm-35-703-2023-supplement-title-page.pdf › ejm-35-703-2023-supplement-title-page.pdf]

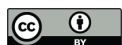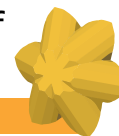

*Supplement of*

**Batoniite,  $[\text{Al}_8(\text{OH})_{14}(\text{H}_2\text{O})_{18}](\text{SO}_4)_5 \cdot 5\text{H}_2\text{O}$ , a new mineral with the  $[\text{Al}_8(\text{OH})_{14}(\text{H}_2\text{O})_{18}]^{10+}$  polyoxocation from the Cetine di Cotorniano Mine, Tuscany, Italy**

**Daniela Mauro et al.**

*Correspondence to:* Daniela Mauro (daniela.mauro@unipi.it)

- ejm-35-703-2023-supplement-title-page.pdf
- Supplementary Tables S1 and S2 .pdf
- batoniite\_rev1 (1).cif

The copyright of individual parts of the supplement might differ from the article licence.
